# Supplementary material
Source: Springer Nature journal article supplement (https://www.springermedizin.de/resource/supplementary/13223_2010_151_MOESM3_ESM.pdf/9597236)

kDa

100

75

50

37

25

20

15

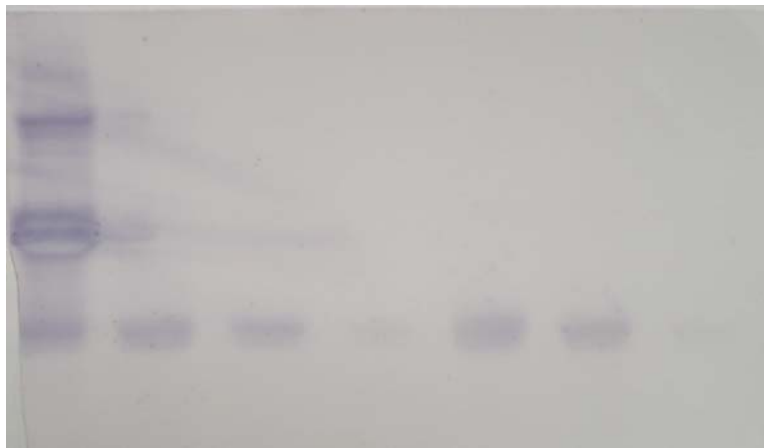

1

2

3

4

5

6

7

Milk

WW

WW

WW

BLG

BLG

BLG

1:10

1:10

1:20

1:100

1

0.5

0.1

$\mu\text{g}/\mu\text{l}$

Supplement: MOESM3 [file 9597236]
